# Supplementary material
Source: ML conference proceedings conference paper supplement (https://openaccess.thecvf.com/content/CVPR2026/html/Ling_SEA-Flow3D_Simplified_Efficient_CVPR_2026_paper.html)
Supplement: Supplementary file 1 [file Ling_SEA-Flow3D_Simplified_Efficient_CVPR_2026_supplemental.pdf]

# SEA-Flow3D: Simplified, Efficient, and Accurate Scene Flow via Spatial Vector Sampling and Multi-scale Refinement

## Supplementary Material

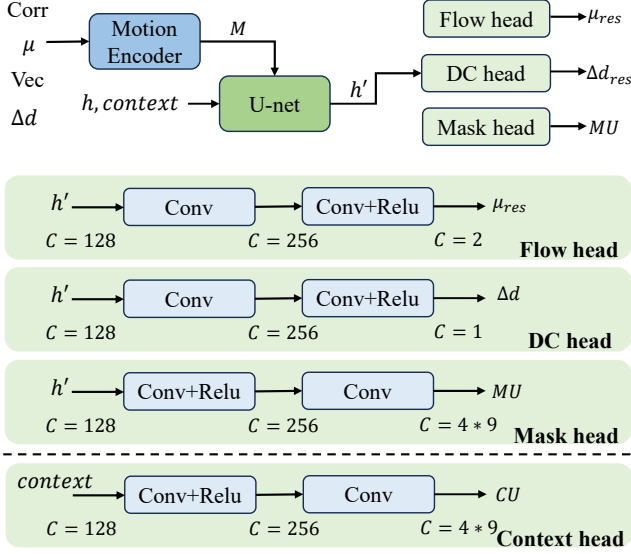

Figure 7. **Optimization pipeline.** Motion features (Corr,  $\mu$ , Vec,  $\Delta d$ ) are first processed by the decoupled motion encoder and then fused with the hidden state  $h$  and context features (C) before being fed into the RNN optimizer (U-Net). The optimizer outputs the updated hidden state  $h'$ , from which three lightweight convolution heads generate the required upsampling masks and residual updates. Here,  $C$  denotes the number of feature channels.

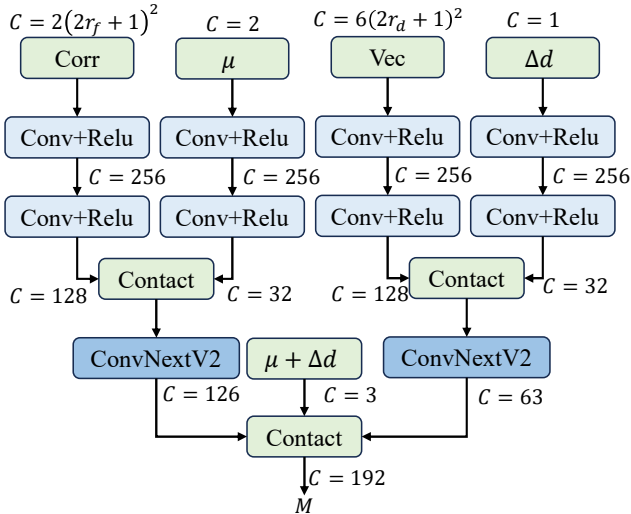

Figure 8. **Architecture of Split Motion Encoder.**

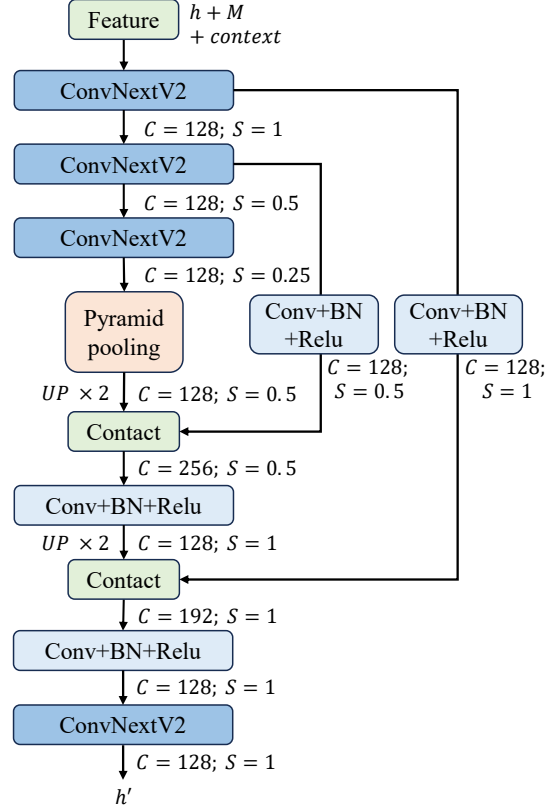

Figure 9. **Structure of the U-Net-style optimizer.**  $S$  denotes the feature-scale resolution, and  $UP \times 2$  indicates bilinear upsampling by a factor of 2.

## 5. Network Architecture Details.

Figs. 7, 8 and 9 provide the complete structural specification of our optimization network. In the U-Net-style optimizer, we incorporate a pyramid pooling module [37] to aggregate global contextual information through multi-scale average pooling.
